# Supplementary material
Source: publisher figshare collection journal article supplement (https://karger.figshare.com/articles/dataset/_/5127499)
Supplement: Supplementary file 1 [file 1]

**Online Suppl. Table 1.** Comparison between AD Group  $t_0$  (before vitamin D supplementation) and the C Group

|                                        | <b>AD Group <math>t_0</math></b> | <b>C Group</b>   | <b>p</b> |
|----------------------------------------|----------------------------------|------------------|----------|
| <b>Vit D (ng/ml)</b>                   | 22.97 $\pm$ 8.03                 | 20.08 $\pm$ 3.23 | NS       |
| <b>SCORAD</b>                          | 46.13 $\pm$ 15.68                | 0.00             | <0.001   |
| <b>IL-2 (pg/ml)</b>                    | 8.22 $\pm$ 7.39                  | 0.08 $\pm$ 0.03  | <0.001   |
| <b>IL-4 (pg/ml)</b>                    | 9.01 $\pm$ 7.05                  | 3.11 $\pm$ 6.99  | 0.02     |
| <b>IL-6 (pg/ml)</b>                    | 15.11 $\pm$ 9.13                 | 4.81 $\pm$ 6.19  | <0.001   |
| <b>IFN-<math>\gamma</math> (pg/ml)</b> | 20.05 $\pm$ 22.84                | 0.05 $\pm$ 0,05  | 0.005    |
| <b>TNF-<math>\alpha</math> (pg/ml)</b> | 8.85 $\pm$ 11.09                 | 3.51 $\pm$ 4.13  | NS       |

**Online Suppl. Table 2.** Comparison between AD Group t<sub>1</sub> and C Group

|                                        | <b>GROUP 1 t<sub>1</sub></b> | <b>CONTROLS</b> | <b>p</b> |
|----------------------------------------|------------------------------|-----------------|----------|
| <b>Vit D (ng/ml)</b>                   | 29.41 ± 10.73                | 20.08± 3.23     | 0.006    |
| <b>SCORAD</b>                          | 22.57 ± 15.28                | 0.00            | <0.001   |
| <b>IL-2 (pg/ml)</b>                    | 1.24 ± 4.06                  | 0.08 ± 0.03     | NS       |
| <b>IL-4 (pg/ml)</b>                    | 1.36 ± 4.26                  | 3.11 ± 6.99     | NS       |
| <b>IL-6 (pg/ml)</b>                    | 6.81 ± 9.60                  | 4.81 ± 6.19     | NS       |
| <b>IFN-<math>\gamma</math> (pg/ml)</b> | 0.19 ± 0.79                  | 0.05 ± 0.05     | NS       |
| <b>TNF-<math>\alpha</math> (pg/ml)</b> | 2.33 ± 4.27                  | 3.51 ± 4.13     | NS       |

**Online Suppl. Table 3.** Description of the group affected by AD (AD Group t<sub>0</sub>); values are expressed as mean  $\pm$  standard deviation (SD)

| Features         | Mean $\pm$ SD        |
|------------------|----------------------|
| Total            | 39                   |
| Males            | 24 (61.5%)           |
| Females          | 15 (38.5%)           |
| Age (years)      | 4 $\pm$ 3.15         |
| Total IgE (kU/L) | 576.22 $\pm$ 1255.96 |
| Eosinophils (%)  | 4.36 $\pm$ 3.65      |
| ECP (U/ml)       | 124.01 $\pm$ 175.16  |

**Online Suppl. Table 4.** Results after vitamin D supplementation (AD Group t<sub>0</sub> vs AD Group t<sub>1</sub>)

|                      | <b>AD Group t<sub>0</sub></b> | <b>AD Group t<sub>1</sub></b> | <b>p</b> |
|----------------------|-------------------------------|-------------------------------|----------|
| <b>Vit D (ng/ml)</b> | 22.97 ± 8.03                  | 29.41 ± 10.73                 | 0.010    |
| <b>SCORAD</b>        | 46.13 ± 15.68                 | 22.57 ± 15.28                 | <0.001   |
| <b>IL-2 (pg/ml)</b>  | 8.22 ± 7.39                   | 1.24 ± 4.06                   | <0.001   |
| <b>IL-4 (pg/ml)</b>  | 9.01 ± 7.05                   | 1.36 ± 4.26                   | <0.001   |
| <b>IL-6 (pg/ml)</b>  | 15.11 ± 9.13                  | 6.81 ± 9.60                   | 0.007    |
| <b>IFN-γ (pg/ml)</b> | 20.05 ± 22.84                 | 0.19 ± 0.79                   | 0.019    |
| <b>TNF-α (pg/ml)</b> | 8.85 ± 11.09                  | 2.33 ± 4.27                   | NS       |
