# Supplementary material
Source: publisher figshare collection journal article supplement (https://karger.figshare.com/articles/dataset/_/5127499)
Supplement: Supplementary file 2 [file 1]

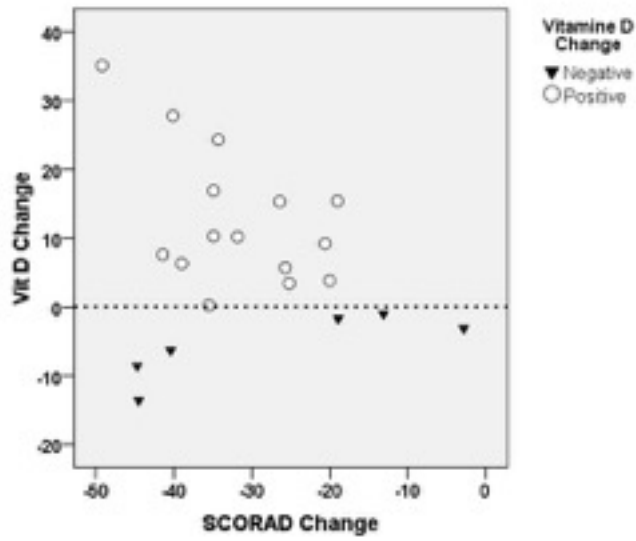

**Suppl. Fig. 1.** Excluding from the statistical analysis 6 patients (**triangles**) that were not able to increase vitamin D levels between the first ( $t_0$ ) and the second visit ( $t_1$ ) in the **AD Group**, Pearson correlation shows a significant negative correlation between the vitamin D change and the SCORAD change ( $r=-0.49$ ,  $p=0.02$ ).
